# Supplementary material for: Gene therapy for alpha 1-antitrypsin deficiency with an oxidant-resistant human alpha 1-antitrypsin
Source: PubMed Central journal article supplement (PMC7455074; doi:10.1172/jci.insight.135951), 2020-08-06

**Supplemental Table I. Sequences of Primers for Mutagenesis of Residues 213, 351 and 358**

| <b>Modification</b> | <b>Sequence</b>                                                                              |
|---------------------|----------------------------------------------------------------------------------------------|
| Val213Ala           | Forward 5'-CCACGTGGACCAGGCCACCACCGTGAAGGT-3'<br>Reverse 5'-ACCTTCACGGTGGTGGCCTGGTCCACGTGG-3' |
| Met351Val           | Forward 5'-GCAGCTGGCGCGGTGTTCTTGGAGGCGATC-3'<br>Reverse 5'-GATCGCCTCCAAGAACACCGCGCCACGTGC-3' |
| Met351Leu           | Forward 5'-CAGCTGGCGCGCTGTTCTTGGAGGCGATCC-3'<br>Reverse 5'-GGATCGCCTCCAAGAACAGCGCGCCACGTG-3' |
| Met358Val           | Forward 5'-CTTGGAGGCGATCCCAGTGTTCGATCCCG-3'<br>Reverse 5'-CGGGATCGACACTGGGATCGCCTCCAAG-3'    |
| Met358Leu           | Forward 5'-CTTGGAGGCGATCCCAGTGTTCGATCCCG-3'<br>Reverse 5'-CGGGATCGACAGTGGGATCGCCTCCAAG-3'    |

## Supplemental Figure Legends

**Supplemental Figure 1.** Schematic of the AAV8/AAT vectors. The expression cassette including the AAV2 inverted terminal repeats (ITR), CAG promoter, optimized human AAT variant cDNA, and polyadenylation signal ( $A_n$ ) was packaged in the AAV8 capsid.

**Supplemental Figure 2.** *In vivo* levels of AAV vector derived DNA in liver as a function of time. C57Bl/6 male and female mice (n=4-5/group) were administered 8/AVL [ $4 \times 10^{10}$ ,  $10^{11}$ ,  $4 \times 10^{11}$  genome copies (gc)], 8/AMM ( $4 \times 10^{11}$  gc), or 8/Null ( $4 \times 10^{11}$  gc) by the intravenous (IV) or intrapleural (IPL) routes. At 0, 4, 12, 24 wk post-administration, mice were sacrificed and livers were harvested. DNA was extracted and vector DNA was quantified by Taqman qPCR. **A.** Males, IV administration. **B.** Males, IPL administration. **C.** Females, IV administration. **D.** Females IPL administration.

**Supplemental Figure 3.** Dose response of human AAT levels in serum and lung epithelial lining fluid (ELF) at 24 wk after 8/AVL administration in male mice. C57Bl/6 male mice (n=4-5/group) were administered 8/AVL ( $4 \times 10^{10}$ ,  $10^{11}$ ,  $4 \times 10^{11}$  gc), 8/AMM ( $4 \times 10^{11}$  gc), or 8/Null ( $4 \times 10^{11}$  gc) by the intravenous (IV) or intrapleural (IPL) routes. Serum and ELF was collected at 24 wk and human AAT was quantified by ELISA. Total protein in ELF was quantified by BCA assay. **A.** Serum 24 wk, IV. **B.** Serum 24 wk, IPL. **C.** ELF 24 wk, IV. **D.** ELF 24 wk, IPL.

**Supplemental Figure 4.** Dose response of human AAT levels in serum and epithelial lining fluid (ELF) at 24 wk after 8/AVL administration in female mice. C57Bl/6 female mice (n=4-5/group) were administered 8/AVL ( $4 \times 10^{10}$ ,  $10^{11}$ ,  $4 \times 10^{11}$  gc), 8/AMM ( $4 \times 10^{11}$  gc), or 8/Null ( $4 \times 10^{11}$  gc) by the intravenous (IV) or intrapleural (IPL) routes. Serum and ELF was collected at 24 wk and human AAT was quantified by ELISA. Total protein in ELF was quantified by BCA assay. **A.** Serum 24 wk, IV. **B.** Serum 24 wk, IPL. **C.** ELF 24 wk, IV. **D.** ELF 24 wk, IPL.

**Supplemental Figure 5.** Anti-NE activity of human AAT in serum and epithelial lining fluid (ELF) from female mice administered AAV8 vectors under normal and oxidizing conditions. C57Bl/6 female mice were administered 8/AMM, 8/AVL, or 8/Null ( $4 \times 10^{11}$  gc) by the intravenous (IV) or intrapleural (IPL) routes. Serum was collected at 4, 12, 24 wk and ELF at 24 wk. Human AAT was quantified by ELISA. Equal amounts (50 nM) of AAT were used in the NE inhibition assay. Data is presented as the % of wild-type (8/AMM) NE inhibition in the absence of oxidizer. Assays were run in triplicate and averaged for samples from n=4-5 mice/group. **A.** Serum, IV, 4 wk. **B.** Serum, IPL, 4 wk. **C.** Serum, IV, 12 wk. **D.** Serum, IPL, 12 wk. **E.** Serum, IV, 24 wk. **F.** Serum, IPL, 24 wk. **G.** ELF, IV, 24 wk. **H.** ELF, IPL, 24 wk.

**Supplemental Figure 6.** Anti-NE activity of human AAT in serum from male mice administered AAV8 vectors under normal and oxidizing conditions with hypochlorous acid (HOCl). C57Bl/6 male mice were administered 8/AMM or 8/AVL ( $4 \times 10^{11}$  gc) by intravenous (IV) and intrapleural (IPL) routes. Serum was collected at 24 wk and human AAT quantified by ELISA. Equal amounts (50 nM) of AAT were used in the NE inhibition assay. Data is presented as the % of wild-type (8/AMM) NE inhibition in the absence of oxidizer HOCl. Assays were run in triplicate and averaged for samples from n=4-5 mice per group. **A.** IV, 24 wk. **B.** IPL, 24 wk.

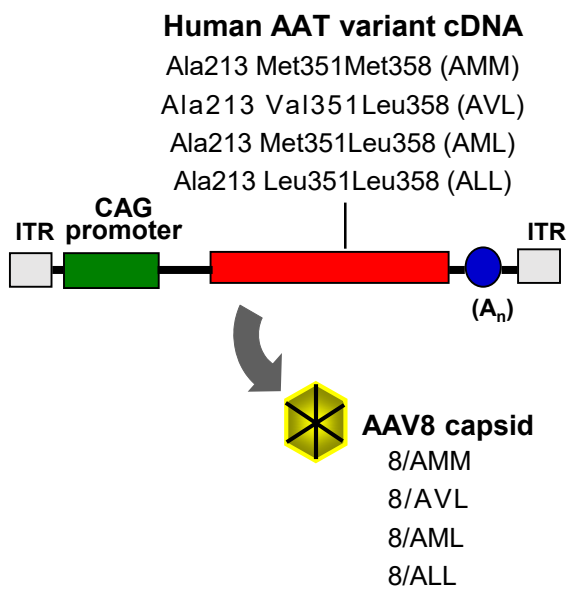

## A. Male IV administration

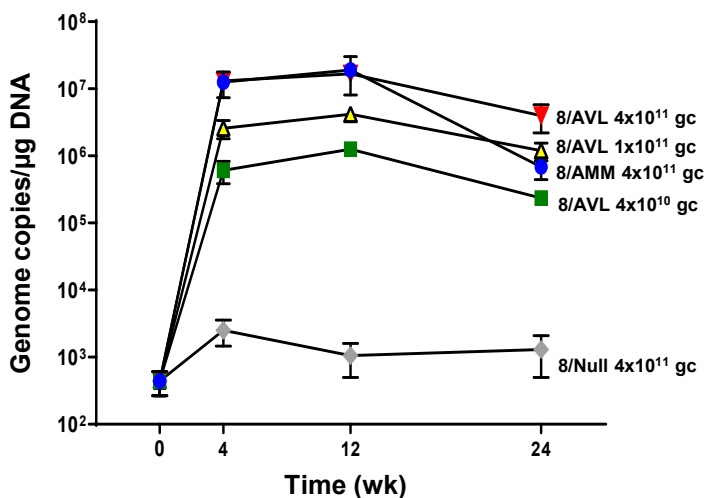

## B. Male IPL administration

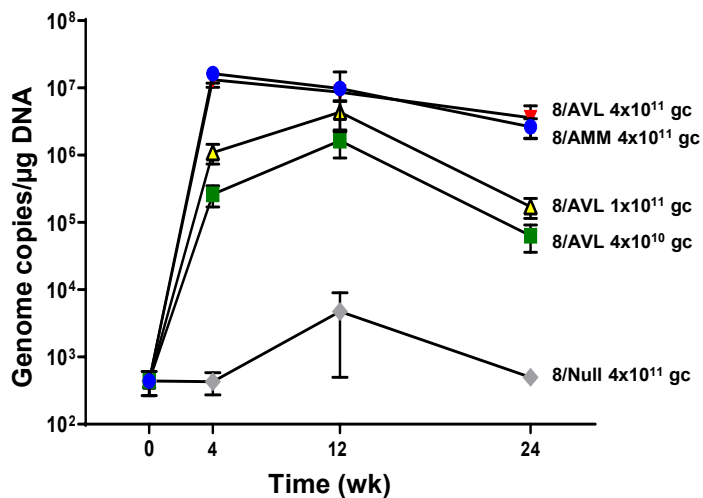

## C. Female IV administration

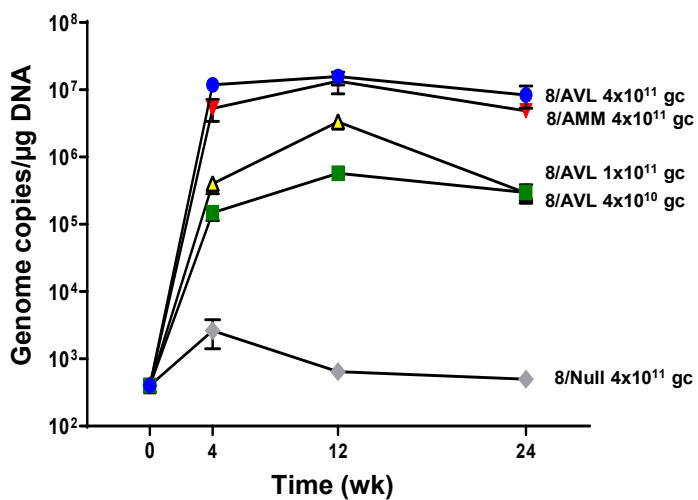

## D. Female IPL administration

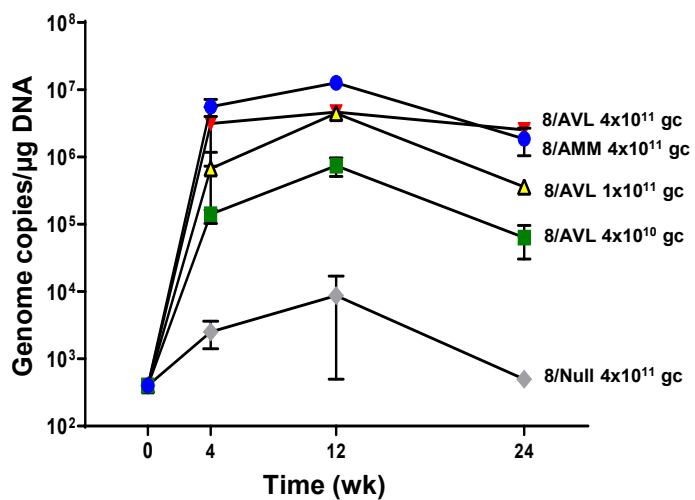

A. Male IV administration, serum 24 wk

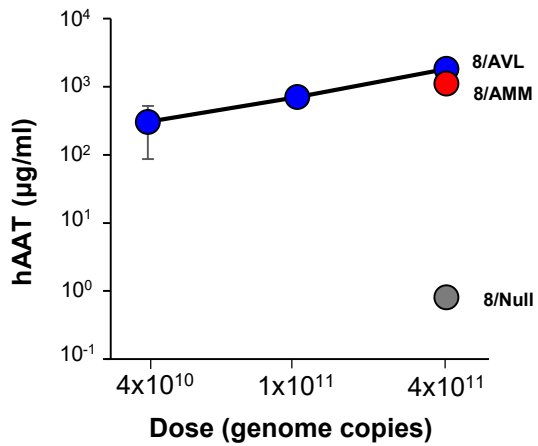

B. Male IPL administration, serum 24 wk

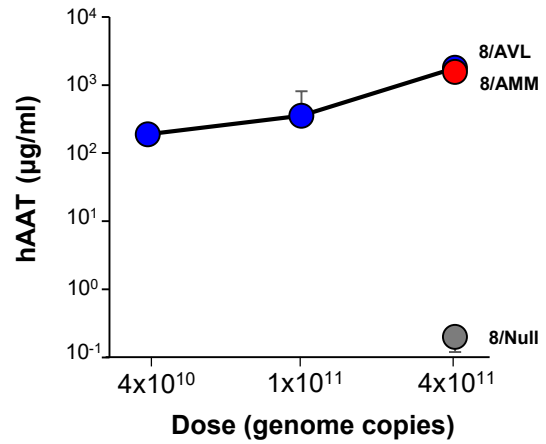

C. Male IV administration, ELF 24 wk

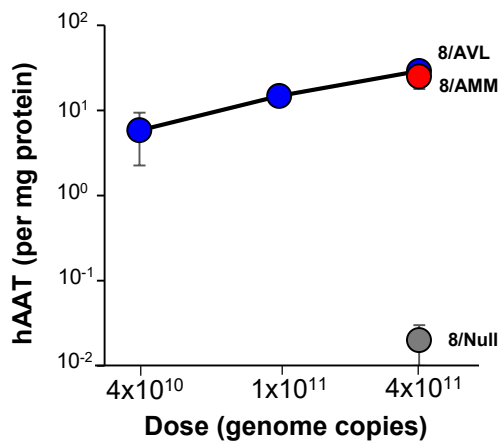

D. Male IPL administration, ELF 24 wk

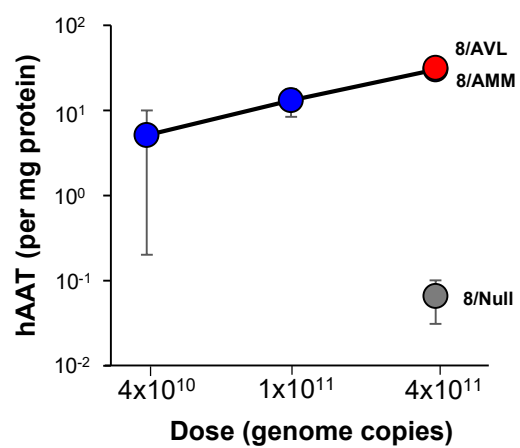

A. Female IV administration, serum 24 wk

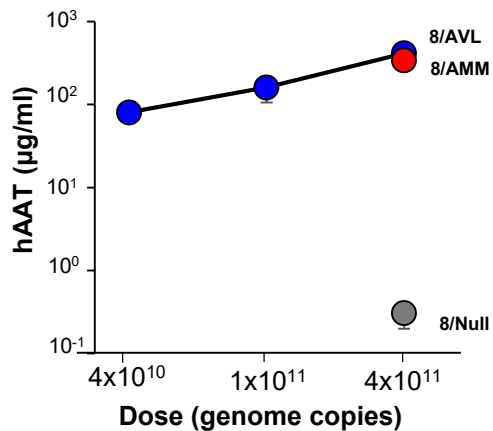

B. Female IPL administration, serum 24 wk

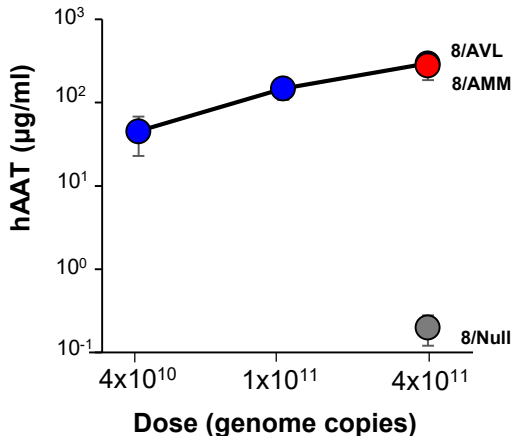

C. Female IV administration, ELF 24 wk

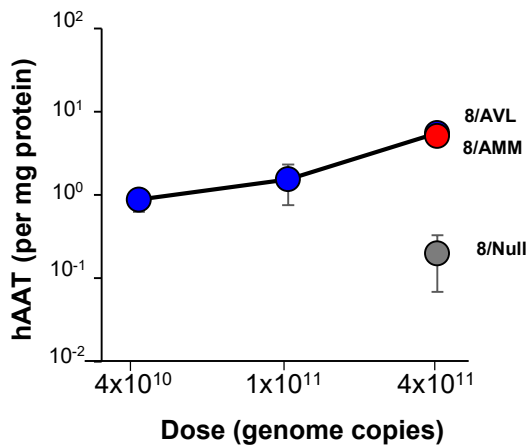

D. Female IPL administration, ELF 24 wk

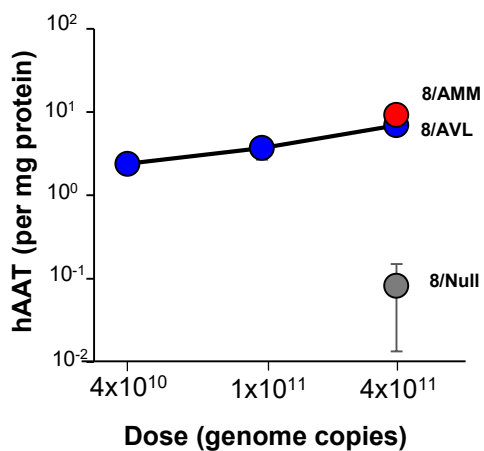

**A. Female IV administration, serum 4 wk**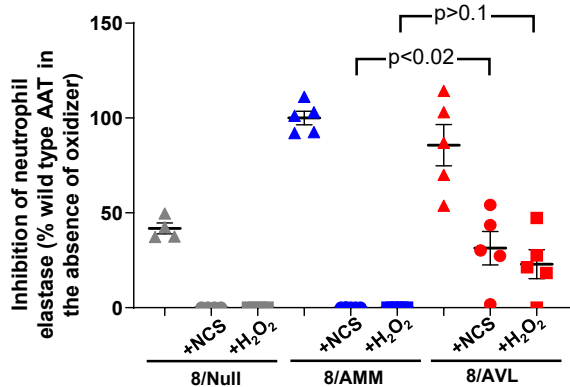**B. Female IPL administration, serum 4 wk**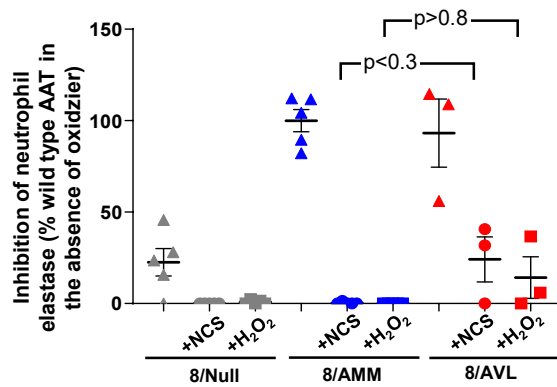**C. Female IV administration, serum 12 wk**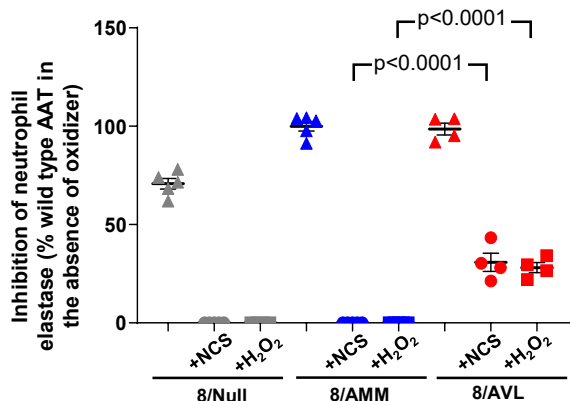**D. Female IPL administration, serum 12 wk**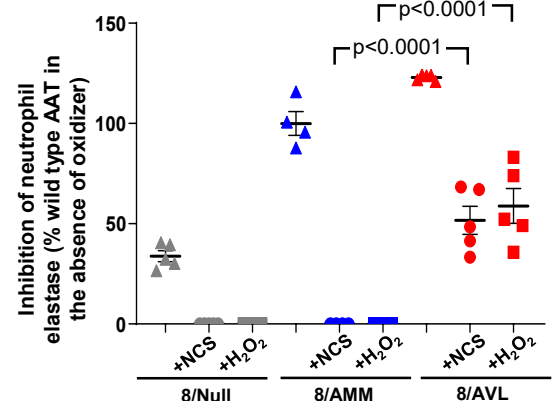**E. Female IV administration, serum 24 wk**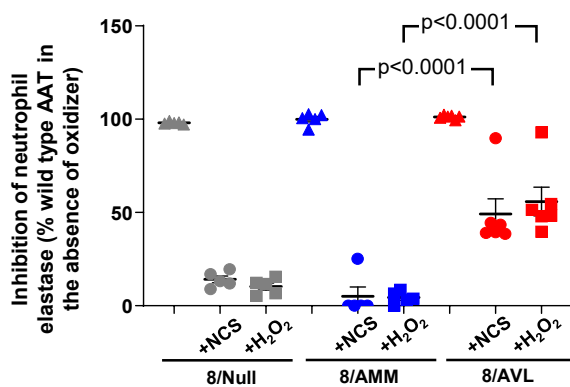**F. Female IPL administration, serum 24 wk**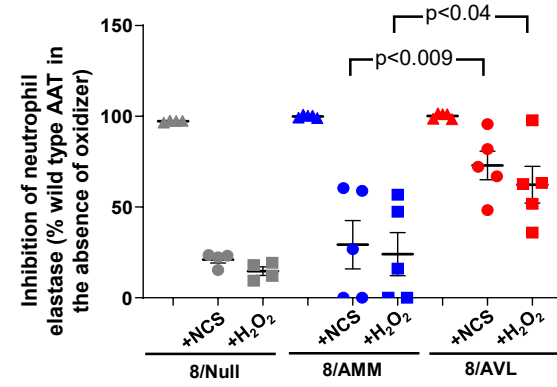**G. Female IV administration, ELF 24 wk**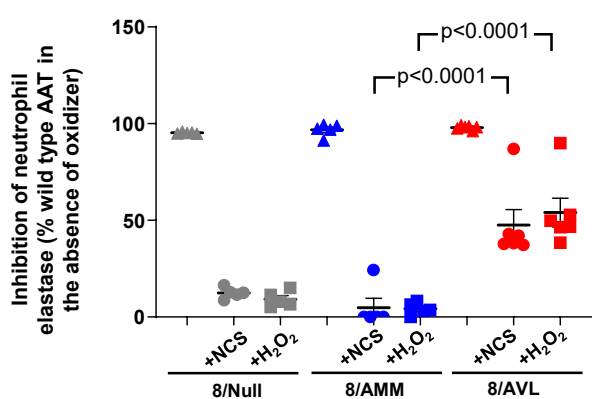**H. Female IPL administration, ELF 24 wk**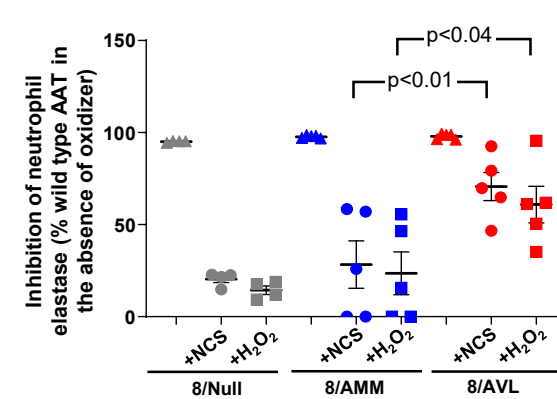



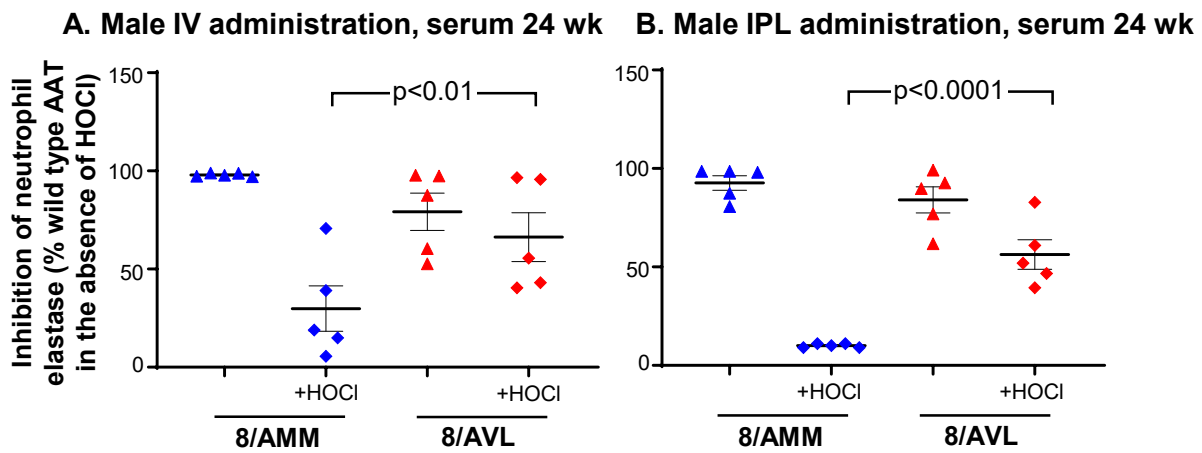

Supplement: jciinsight-5-135951-s058.pdf [file jciinsight-5-135951-s058.pdf]
